# Supplementary material
Source: PubMed Central journal article supplement (PMC5568428)
Supplement: NIHMS885429-supplement-sup.pdf [file NIHMS885429-supplement-sup.pdf]

## Supplementary Figure 1. Original immunoblot images

**Figure 1a**

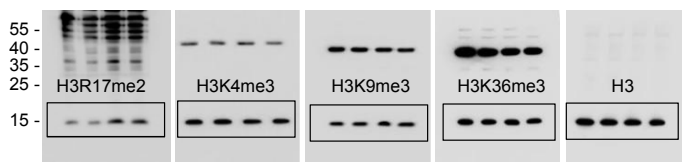

**Figure 1b**

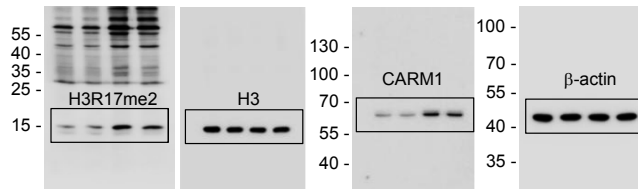

**Figure 1b**

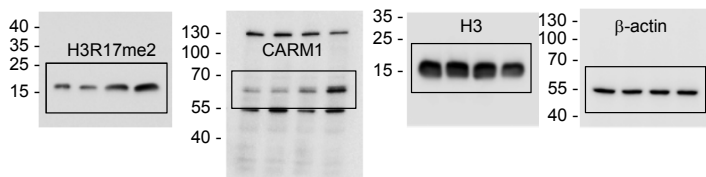

**Figure 1c**

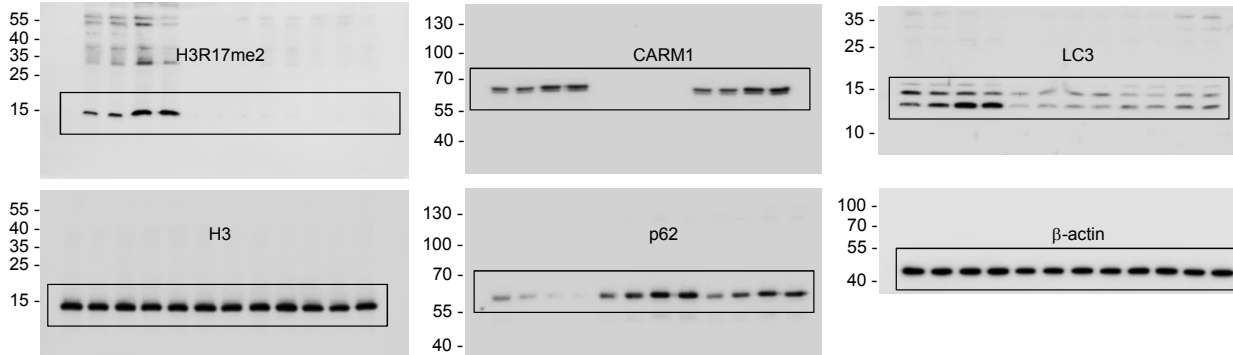

**Figure 2a**

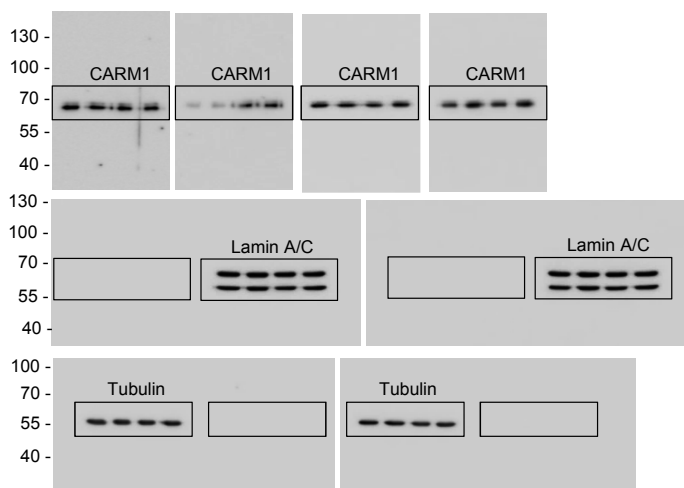

**Figure 2b**

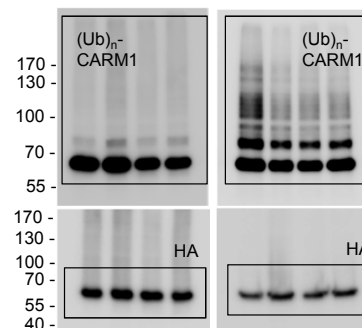

**Figure 2d**

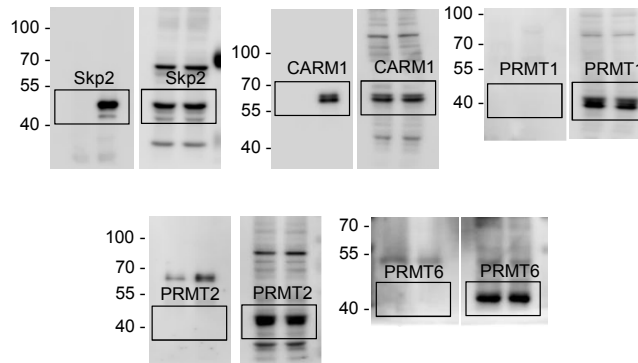

Supplementary Figure 1. Original immunoblot images (continued)

Figure 2e

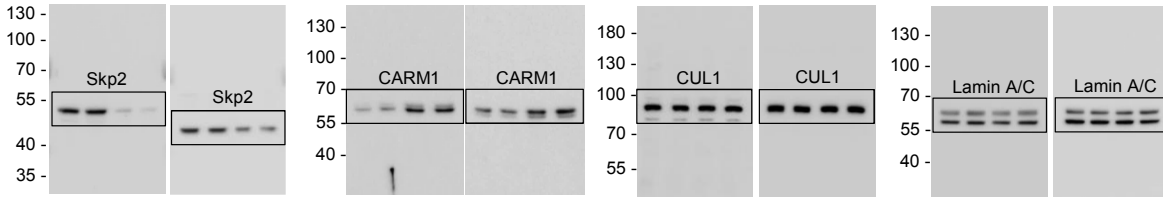

Figure 2f

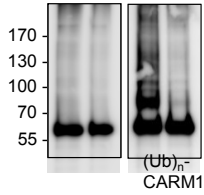

Figure 2g

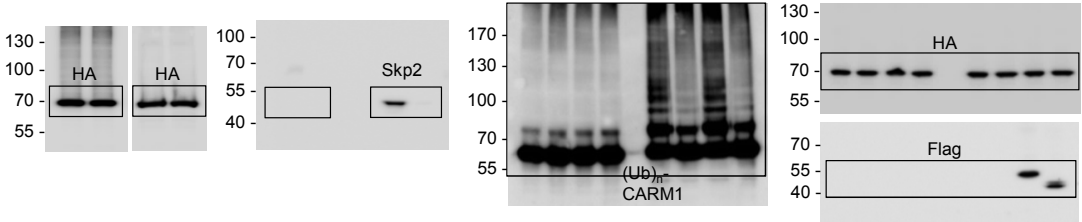

Figure 3a

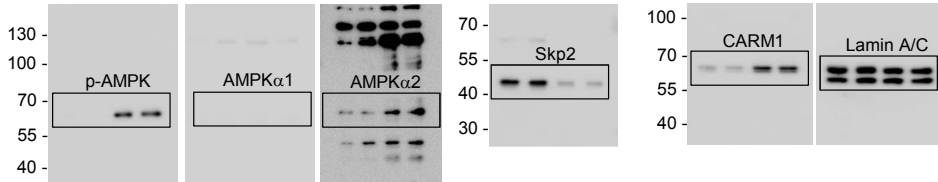

Figure 3b

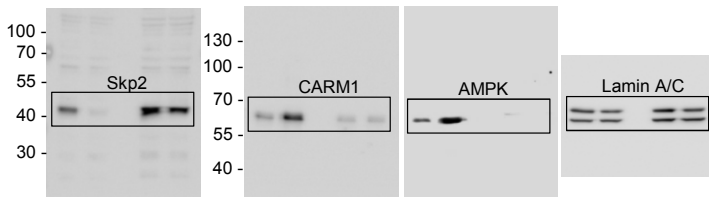

Figure 3i

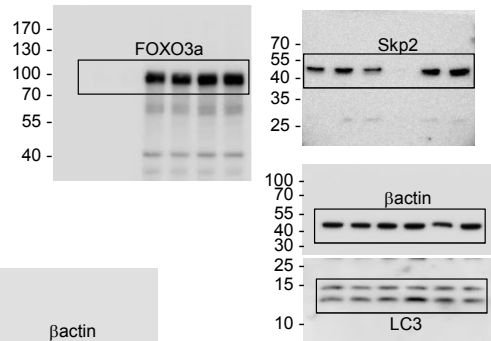

Figure 3k

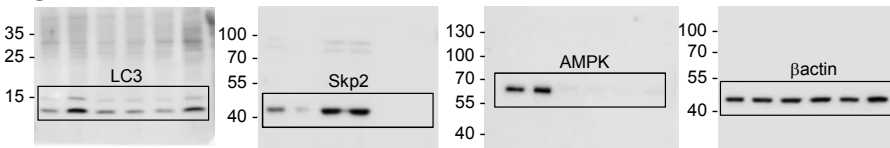

Figure 4a

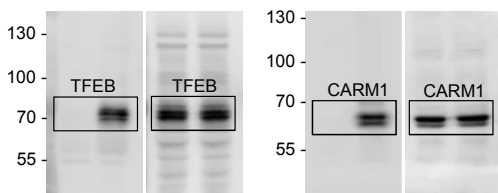

Figure 4h

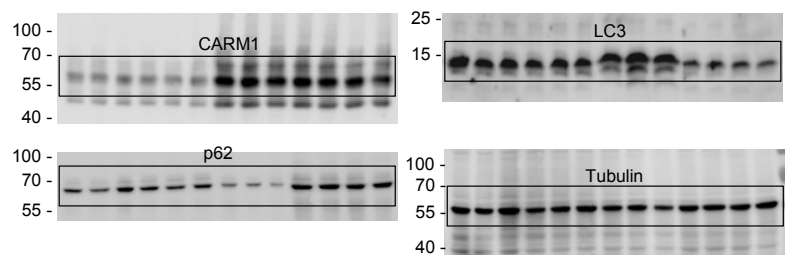

Figure 4g

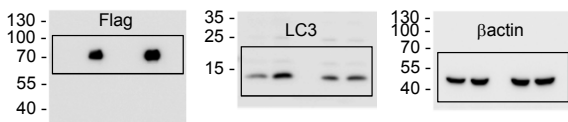

Supplementary Figure 1. Original immunoblot images (continued)

Ext Data Figure 1a

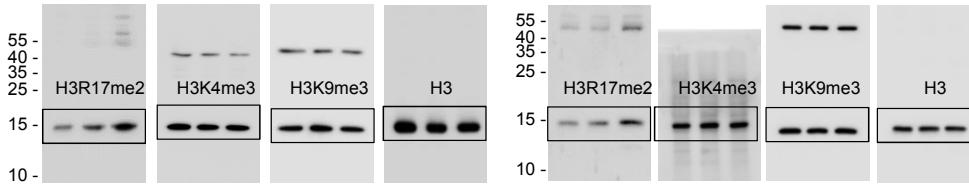

Ext Data Figure 1b

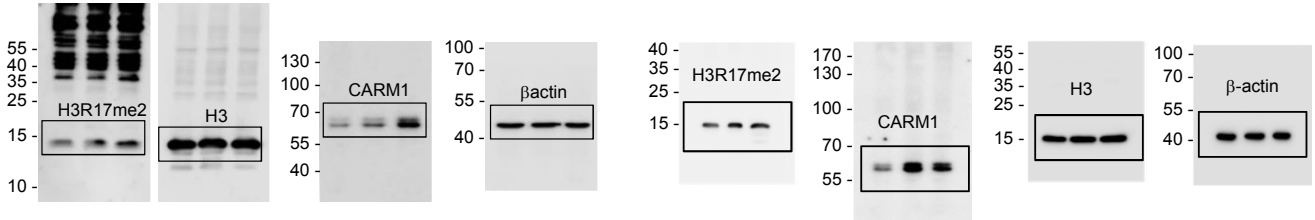

Ext Data Figure 1c

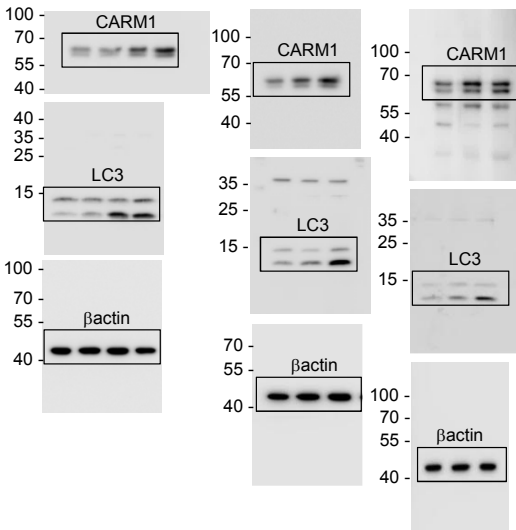

Ext Data Figure 1d

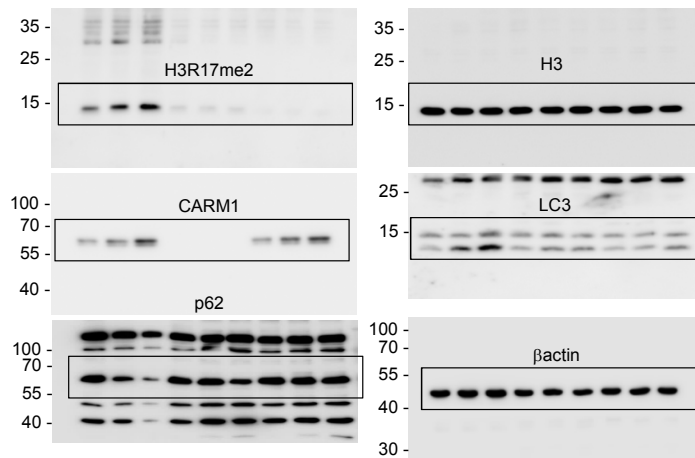

Ext Data Figure 2a

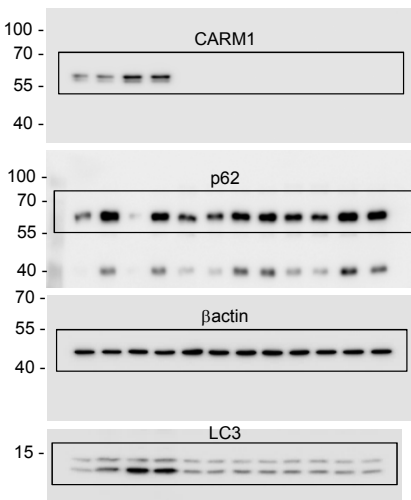

Ext Data Figure 2b

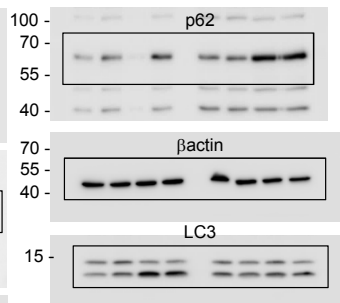

Ext Data Figure 2d

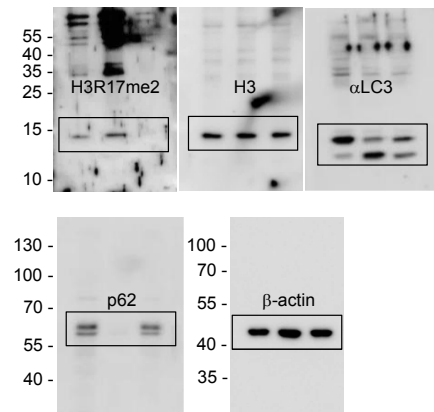

Supplementary Figure 1. Original immunoblot images (continued)

Ext Data Figure 2f

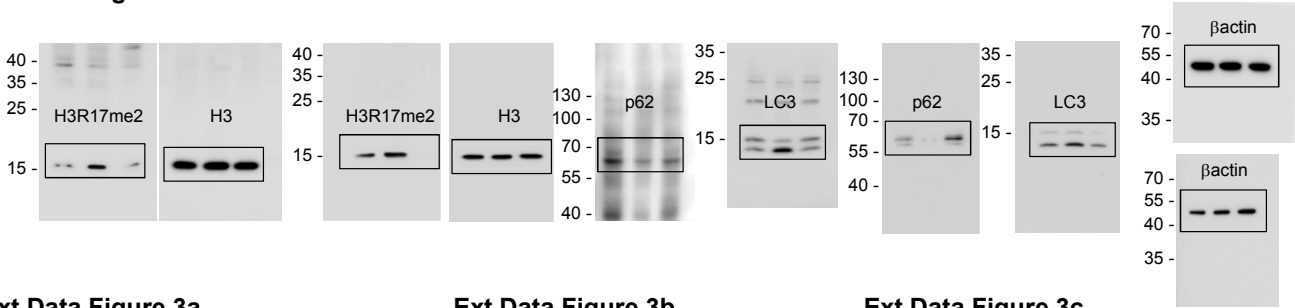

Ext Data Figure 3a

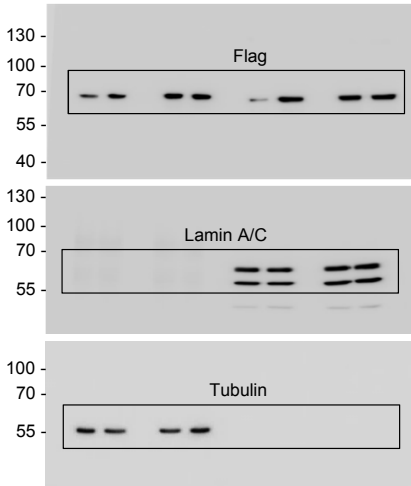

Ext Data Figure 3b

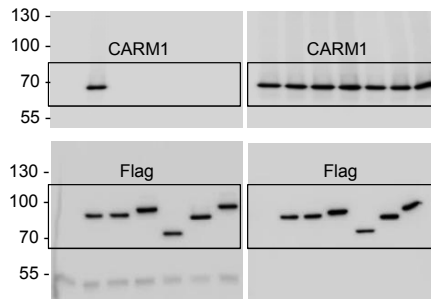

Ext Data Figure 3c

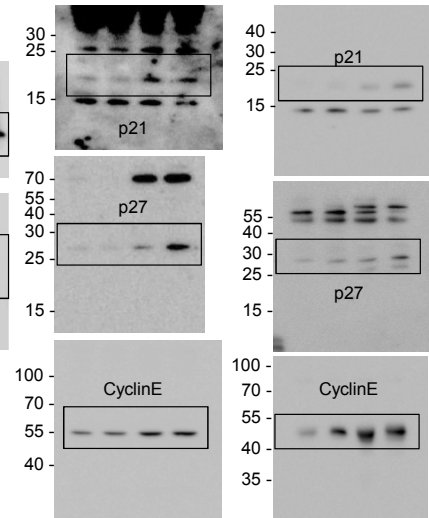

Ext Data Figure 3d

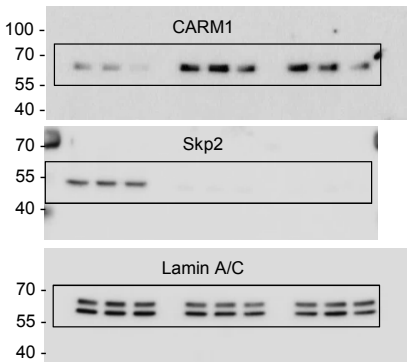

Ext Data Figure 3e

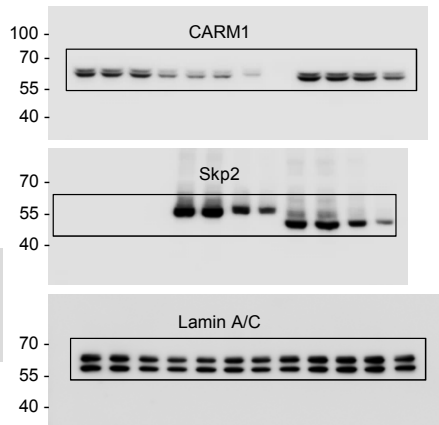

Ext Data Figure 4c

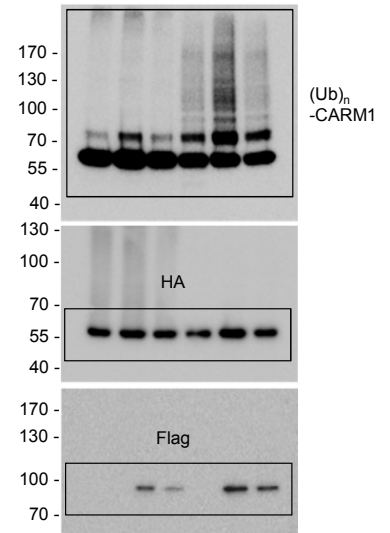

Ext Data Figure 4a

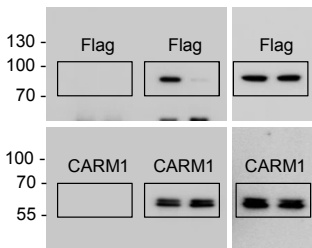

Ext Data Figure 4b

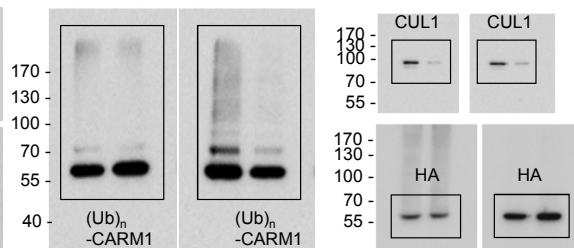

Supplementary Figure 1. Original immunoblot images (continued)

Ext Data Figure 4d

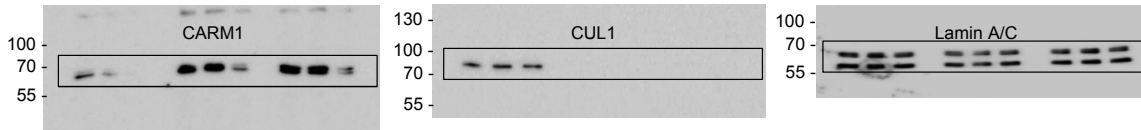

Ext Data Figure 4e

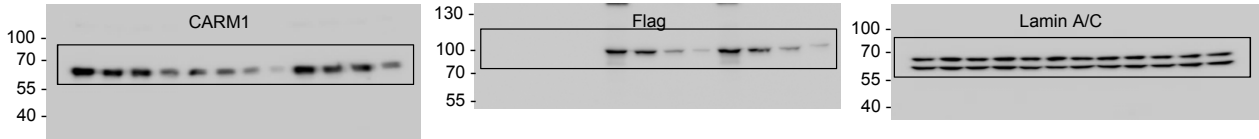

Ext Data Figure 5c

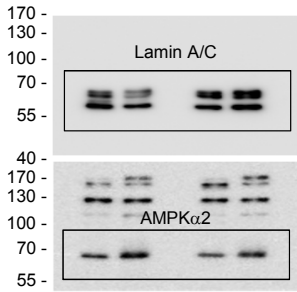

Ext Data Figure 5d

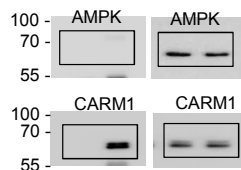

Ext Data Figure 5f

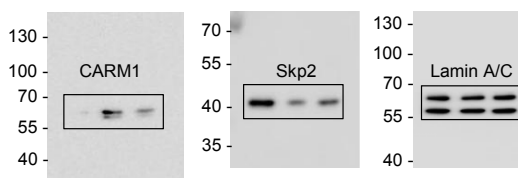

Ext Data Figure 5e

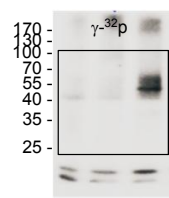

Ext Data Figure 5g

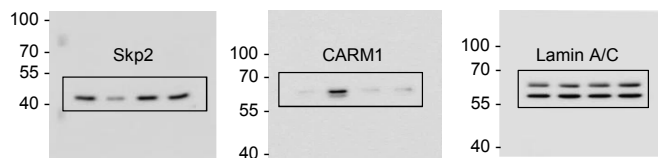

Ext Data Figure 5h

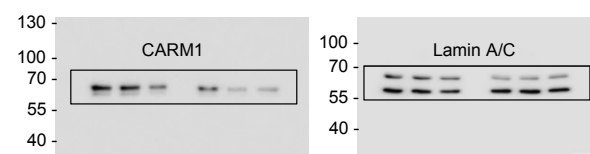

Ext Data Figure 5i

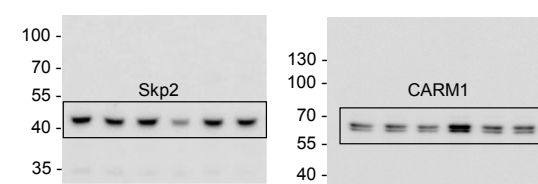

Ext Data Figure 5j

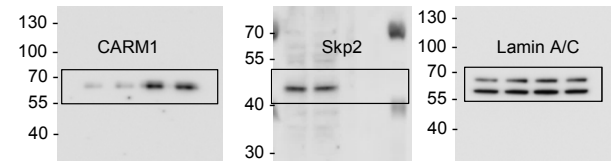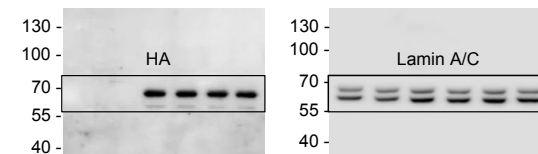

Ext Data Figure 5k

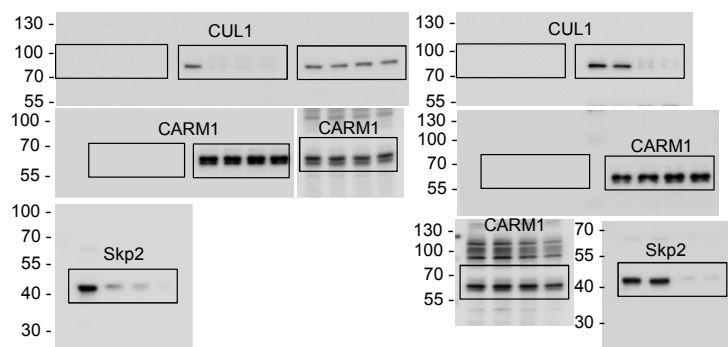

Ext Data Figure 5l

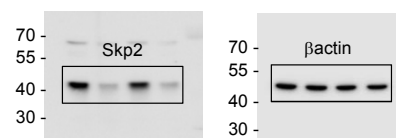

Ext Data Figure 5n

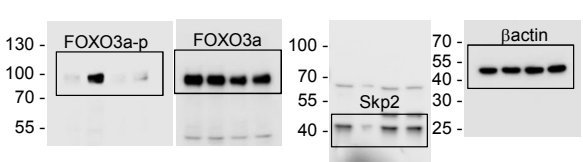

Supplementary Figure 1. Original immunoblot images (continued)

Ext Data Figure 7b

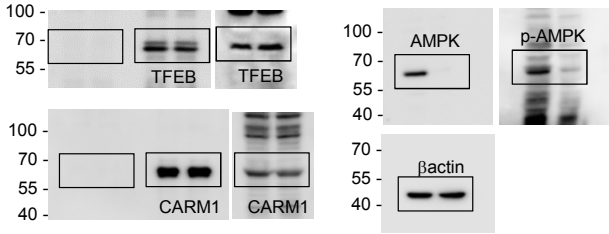

Ext Data Figure 7c

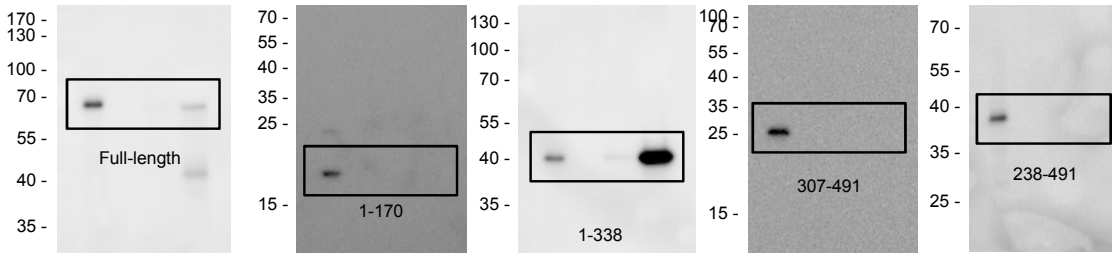

Ext Data Figure 7d

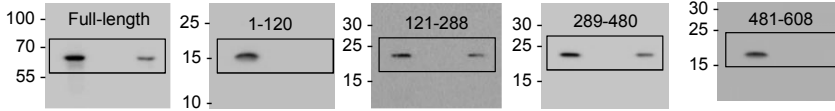

Ext Data Figure 7e

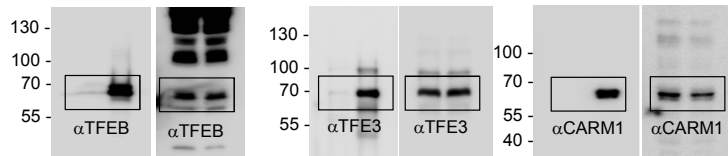

Ext Data Figure 8c

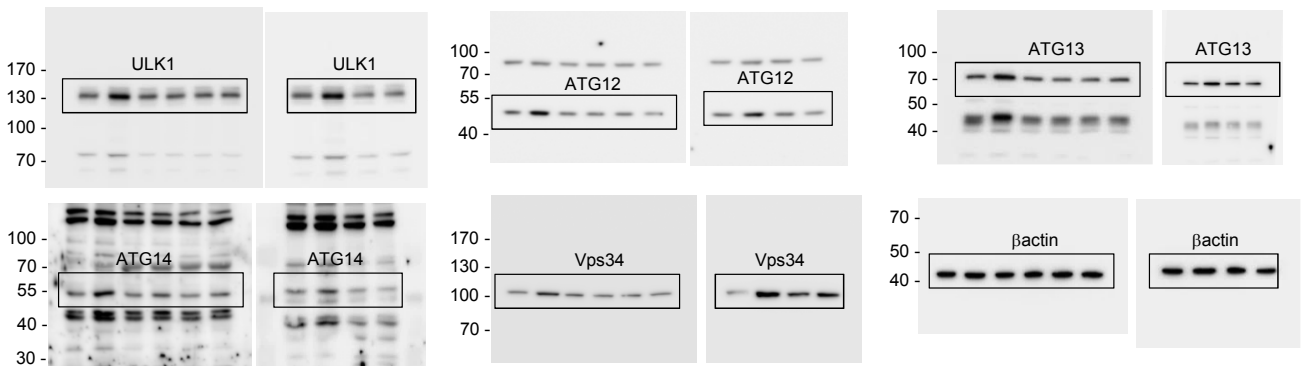

**Supplementary Table 1. List of peptides and protein sequences identified by LC-MS/MS**

**Skp2**

| Peptide sequence                     | Number of Peptides | Protein name | SpecEValue  |
|--------------------------------------|--------------------|--------------|-------------|
| LASDESLWQTLDLTGK                     | 22                 | SKP2_HUMAN   | 2.30534E-20 |
| LLSQGVIAFR                           | 15                 | SKP2_HUMAN   | 7.49177E-13 |
| LSDPIVNTLAK                          | 15                 | SKP2_HUMAN   | 3.80855E-14 |
| LQNLSLEGLR                           | 12                 | SKP2_HUMAN   | 1.78157E-12 |
| SKGSDKDFVIVR                         | 7                  | SKP2_HUMAN   | 4.32471E-16 |
| NLQKSDLSTLVR                         | 6                  | SKP2_HUMAN   | 1.92593E-15 |
| GSDKDFVIVR                           | 5                  | SKP2_HUMAN   | 1.68146E-13 |
| SFMDQPLAEHFSPFR                      | 5                  | SKP2_HUMAN   | 2.25122E-19 |
| LASDESLWQTLDLTGKLNHPDVTGR            | 4                  | SKP2_HUMAN   | 1.10486E-31 |
| LQNLSLEGLRLSDPIVNTLAK                | 4                  | SKP2_HUMAN   | 1.06744E-23 |
| EEPDSENIQELLSNLGHPEPPR               | 2                  | SKP2_HUMAN   | 1.5803E-24  |
| GSDKDFVIVRRPK                        | 2                  | SKP2_HUMAN   | 5.31665E-15 |
| LLSQGVIAFRC+57.021PR                 | 2                  | SKP2_HUMAN   | 4.42809E-11 |
| LNLSGC+57.021SGFSEFALQTLSSC+57.021SR | 2                  | SKP2_HUMAN   | 4.05008E-16 |
| NLHPDVTGR                            | 2                  | SKP2_HUMAN   | 3.25938E-12 |
| NLQKSDLSTLVRR                        | 2                  | SKP2_HUMAN   | 3.6342E-12  |
| SDLSTLVR                             | 2                  | SKP2_HUMAN   | 1.37593E-10 |
| SDLSTLVRR                            | 2                  | SKP2_HUMAN   | 7.76671E-12 |
| TSELLSGMGVSALEK                      | 2                  | SKP2_HUMAN   | 2.38974E-14 |
| C+57.021PNLVHLDLSDSVMLK              | 1                  | SKP2_HUMAN   | 9.30382E-18 |
| LKSKGSDKDFVIVR                       | 1                  | SKP2_HUMAN   | 1.41471E-17 |
| LSDPIVNTLAKNSNLVR                    | 1                  | SKP2_HUMAN   | 7.66848E-19 |
| SKGSDKDFVIVRRPK                      | 1                  | SKP2_HUMAN   | 7.70236E-11 |

**CUL1**

| Peptide sequence        | Number of Peptides | Protein name | SpecEValue  |
|-------------------------|--------------------|--------------|-------------|
| ESTEFLQQNPVTEYMK        | 1                  | CUL1_HUMAN   | 6.69029E-21 |
| FYTQQWEDYR              | 1                  | CUL1_HUMAN   | 8.30789E-16 |
| LLETHIHNQGLAAIEK        | 1                  | CUL1_HUMAN   | 2.4525E-14  |
| LLIQAAIVR               | 1                  | CUL1_HUMAN   | 3.75849E-11 |
| LLVLEDENANVDEVELKPDTLIK | 1                  | CUL1_HUMAN   | 2.02498E-20 |
| NPPEAELEDTLNQVMVFK      | 1                  | CUL1_HUMAN   | 1.36921E-12 |
| QIGLDQIWDDLRL           | 1                  | CUL1_HUMAN   | 1.14373E-15 |
| VQVYLHESTQDELAR         | 1                  | CUL1_HUMAN   | 5.80278E-18 |
| YIEDKDVFK               | 1                  | CUL1_HUMAN   | 5.01813E-14 |

Supplementary Table 2. (A) List of autophagy-related and lysosomal genes

| Autophagy genes (n=246) |          |          |          |          |         |        |
|-------------------------|----------|----------|----------|----------|---------|--------|
| Akt1                    | Brsk1    | Dclk2    | Hif1a    | Nampt    | Rab5a   | Ulk1   |
| Akt2                    | Brsk2    | Ddit3    | Hsp90ab1 | Nbr1     | Rac1    | Ulk2   |
| Akt3                    | Calcoco1 | Dlc1     | Hspa5    | Nckap1   | Raf1    | Ulk3   |
| Ambra1                  | Calcoco2 | Dnajb1   | Hspa8    | Nfe2l2   | Rb1     | Usp10  |
| Arnt                    | Camk1    | Dnajb9   | Hspb8    | Nfkb1    | Rb1cc1  | Uvrag  |
| Arsa                    | Camk1d   | Dram1    | Ifng     | Nlx2-3   | Rela    | Vamp3  |
| Arsb                    | Camk1g   | Edem1    | Ikbkb    | Nlrc4    | Rgs19   | Vegfa  |
| Atf4                    | Camk2a   | Eef2     | Ikbke    | Npc1     | Rheb    | Wdfy3  |
| Atf6                    | Camk2b   | Eef2k    | Il24     | Nrg1     | Rock1   | Wdr45  |
| Atg10                   | Camk2d   | Egfr     | Itga3    | Nrg2     | Rps6kb1 | Wipi1  |
| Atg12                   | Camk2g   | Eif2ak2  | Itga6    | Nrg3     | Rps6kb2 | Wipi2  |
| Atg13                   | Camkk2   | Eif2ak3  | Itgb1    | Nuak1    | Rptor   | Zfyve1 |
| Atg16i1                 | Canx     | Eif2s1   | Itgb4    | Nuak2    | Sar1a   |        |
| Atg16i2                 | Capn1    | Eif4ebp1 | Itpr1    | P4hb     | Sesn2   |        |
| Atg2a                   | Capn10   | Eif4g1   | Kif15    | Park2    | Sgk1    |        |
| Atg2b                   | Capn2    | ErbB2    | Kif5b    | Parp1    | Sgk2    |        |
| Atg3                    | Capns1   | Ern1     | Klhl24   | Pelp1    | Sgk3    |        |
| Atg4a                   | Casp1    | Ero1l    | Lamp1    | Pex14    | Sh3glb1 |        |
| Atg4b                   | Casp3    | Fadd     | Lamp2    | Pex3     | Sik1    |        |
| Atg4c                   | Casp4    | Fas      | Map1lc3a | Phldb2   | Sik2    |        |
| Atg4d                   | Casp8    | Fkbp1a   | Map1lc3b | Pik3c3   | Sirt1   |        |
| Atg5                    | Ccl2     | Fkbp1b   | Map2k7   | Pik3r4   | Sirt2   |        |
| Atg7                    | Ccr2     | Fos      | Mapk1    | Pink1    | Snrk    |        |
| Atg9a                   | Cd46     | Foxo1    | Mapk3    | Pkd1l3   | Sphk1   |        |
| Atg9b                   | Cdkn1a   | Foxo3    | Mapk8    | Plk3     | Spns1   |        |
| Atic                    | Cdkn1b   | Gaa      | Mapk8ip1 | Plk4     | Sqstm1  |        |
| Bag1                    | Cdkn2a   | Gabarap  | Mapk9    | Pnck     | Stt3    |        |
| Bag3                    | Cflar    | Gabarap1 | Mark1    | Ppp1r15a | Stk11   |        |
| Bak1                    | Chd9     | Gabarap2 | Mark2    | Prkaa1   | Stk33   |        |
| Bax                     | Chmp2b   | Gapdh    | Mark3    | Prkaa2   | Stk36   |        |
| Bcl2                    | Chmp4b   | Gnai3    | Mark4    | Prkab1   | Tbk1    |        |
| Bcl2l1                  | Cln3     | Gnb2l1   | Mbtps2   | Prkar1a  | Thoc5   |        |
| Becn1                   | Ctsb     | Gopc     | Mlst8    | Prkcd    | Tm9sf1  |        |
| Bid                     | Ctsd     | Grid1    | Mtmr14   | Prkcq    | Tmem74  |        |
| Birc5                   | Cx3cl1   | Grid2    | Mtor     | Pten     | Tnfsf10 |        |
| Birc6                   | Cxcr4    | Harbi1   | Muc6     | Plk6     | Tpr     |        |
| Bnip1                   | Dapk1    | Hdac1    | Myc      | Rab11a   | Tsc1    |        |
| Bnip3                   | Dapk2    | Hdac6    | Myo18a   | Rab24    | Tsc2    |        |
| Bnip3l                  | Dclk1    | Hgs      | Naf1     | Rab33b   | Tusc1   |        |



**Supplementary Table 2. (A) List of autophagy-related and lysosomal genes (continued)**

| Lysosomal genes (n=348) |          |         |         |         |             |          |          |         |
|-------------------------|----------|---------|---------|---------|-------------|----------|----------|---------|
| Abca2                   | Atp5b    | Cts7    | Fnbp1   | Hyal1   | Mcoln1      | Pld3     | Slc17a5  | Tpcn2   |
| Abca5                   | Atp6ap1  | Ctsa    | Fth1    | Hyal2   | Mfsd8       | Plekhhf1 | Slc26a11 | Tpp1    |
| Abcb9                   | Atp6v0a1 | Ctsb    | Ftl1    | Hyal3   | Mlc1        | Plod1    | Slc29a3  | Trim23  |
| Acp2                    | Atp6v0a2 | Ctsc    | Fuca1   | Ids     | Mmd         | Pnpla7   | Slc31a1  | Trip10  |
| Acp5                    | Atp6v0a4 | Ctsd    | Fuca2   | Idua    | Mmp13       | Pon2     | Slc36a1  | Tspan1  |
| Acpp                    | Atp6v0b  | Ctse    | Fyco1   | Ifi30   | Mpo         | Ppt1     | Slc48a1  | Unc13d  |
| Ada                     | Atp6v0c  | Ctsf    | Gaa     | Ifitm3  | Mt1         | Ppt2     | Smpd1    | Unc93b1 |
| Adam8                   | Atp6v0d1 | Ctsg    | Gabarap | Igf2r   | Mtor        | Pqlc2    | Smpd3a   | Uvrag   |
| Aga                     | Atp6v0d2 | Ctsh    | Galc    | Il4i1   | Myh1        | Prcp     | Snap23   | Vamp8   |
| Aldob                   | Atp6v1g1 | Ctsj    | Galns   | Irgm1   | Myo7a       | Prdx6    | Snapin   | Vma21   |
| Ank3                    | Atp6v1h  | Ctsk    | Gba     | Itm2c   | Naaa        | Prf1     | Snx16    | Vps11   |
| Ankrd27                 | Bcl10    | Ctsl    | Gc      | Kcne1   | Naga        | Prss16   | Sort1    | Vps18   |
| Anxa11                  | Calcr1   | Ctsm    | Gga1    | Kcne2   | Naglu       | Psap     | Spaca3   | Vps33a  |
| Ap1b1                   | Cat      | Ctso    | Gga2    | Kif2a   | Nagpa       | Psapl1   | Sphk2    | Vps33b  |
| Ap1g1                   | Ccdc115  | Ctsr    | Gga3    | Lamp1   | Napsa       | Psen1    | Spns1    | Vps36   |
| Ap1g2                   | Cckar    | Ctss    | Ggh     | Lamp2   | Nbr1        | Psen2    | Src      | Vps39   |
| Ap1m1                   | Ccz1     | Ctsw    | Gimap5  | Lamp3   | Ncstn       | Rab14    | Srgn     | Vps4b   |
| Ap1m2                   | Cd164    | Ctsz    | Gja1    | Lamtor1 | Neu1        | Rab27a   | Stx3     | Wdr48   |
| Ap1s1                   | Cd1d1    | Cubn    | Gla     | Lamtor2 | Neu4        | Rab7     | Stx7     | Znrf1   |
| Ap1s2                   | Cd1d2    | Cxcr2   | Glb1    | Laptm4a | Ngp         | Rab9     | Stx8     | Znrf2   |
| Ap1s3                   | Cd300lh  | Dirc2   | Gm2a    | Laptm4b | Nos1        | Rilp     | Stxbp2   |         |
| Ap3b1                   | Cd63     | Dnase2a | Gnptab  | Laptm5  | Npc1        | Rnase6   | Sult1c2  |         |
| Ap3b2                   | Cd68     | Dnase2b | Gnptg   | Ldir    | Npc2        | Rnaset2a | Sumf1    |         |
| Ap3d1                   | Cd74     | Doc2a   | Gns     | Lgmn    | Nppa        | Rnaset2b | Syt7     |         |
| Ap3m1                   | Ces1d    | Dpp4    | Got1    | Lhcgr   | Nup62-il4i1 | Rnf13    | Tcirg1   |         |
| Ap3m2                   | Ces2e    | Dpp7    | Gpc3    | Lipa    | Oca2        | Rnf152   | Tecpr1   |         |
| Ap3s1                   | Ces3b    | Dram1   | Gpr137b | Litaf   | Ostm1       | Rptor    | Thbs1    |         |
| Ap3s2                   | Chid1    | Dram2   | Gpr143  | Lmbrd1  | P2ry2       | Rraga    | Tlr7     |         |
| Ap4b1                   | Chit1    | Ear14   | Grn     | Lpl     | P4hb        | Rragb    | Tlr9     |         |
| Ap4e1                   | Cln7     | Ear4    | Gusb    | Lrba    | Pax2        | Rragc    | Tm9sf1   |         |
| Ap4m1                   | Cln3     | Eif5a   | H2-Aa   | Ltf     | Pcsk9       | Rragd    | Tmbim1   |         |
| Ap4s1                   | Cln5     | Elane   | H2-DMa  | M6pr    | Pcyox1      | Scarb2   | Tmem106b |         |
| Aqp2                    | Cita     | Enpep   | H2-DMb2 | Man2b1  | Pdgfrb      | Scpep1   | Tmem192  |         |
| Arl8a                   | Citb     | Entpd4  | H2-Eb1  | Man2b2  | Pdia3       | Selenbp2 | Tmem55a  |         |
| Arl8b                   | Citc     | Epdr1   | H2-Ob   | Manba   | Pf4         | Sgsh     | Tmem55b  |         |
| Arsa                    | Creg1    | Fam20c  | Hck     | Manf    | Pla2g15     | Siae     | Tmem63a  |         |
| Arsb                    | Crhbp    | Fasl    | Hexa    | March1  | Pla2g4e     | Sidt2    | Tmem74   |         |
| Arsg                    | Cst3     | Fgb     | Hexb    | March2  | Pla2g4f     | Slc11a1  | Tmem9    |         |
| Asah1                   | Ctbs     | Fgfr3   | Hgsnat  | March3  | Plb1        | Slc11a2  | Tmem97   |         |
| Ass1                    | Ctns     | Flot1   | Hps4    | March8  | Plbd1       | Slc15a3  | Tnfaip3  |         |
| Atp13a2                 | Ctrb1    | Flot2   | Hpse    | March9  | Plbd2       | Slc15a4  | Tpcn1    |         |

- Lysosomal genes were obtained from Lysosomal gene database <http://lysosome.unipg.it>

- Autophagy genes were combined from the Human Autophagy Database (<http://autophagy.lu>)

and the mouse Autophagy Database (<http://www.tanpaku.org/autophagy>)

Supplementary Table 2. (B) List of genes from RNA-seq. cluster 1 with putative CLEAR motif

| Gene name     | Chr. location | motif_start (mm9)              | Gene name     | Chr. location | motif_start (mm9)              |
|---------------|---------------|--------------------------------|---------------|---------------|--------------------------------|
| 1700001L05Rik | chr15         | [83197910]                     | Fam214a       | chr9          | [74800675]                     |
| 1700007K13Rik | chr2          | [28321866]                     | Fbxl3         | chr14         | [103499033]                    |
| 1700030K09Rik | chr8          | [74967716]                     | Fbxo10        | chr4          | [45097484]                     |
| 2410006H16Rik | chr11         | [62416289]                     | Fbxo25        | chr8          | [13907715]                     |
| 6430548M08Rik | chr8          | [122668471]                    | Ficn          | chr11         | [59623457]                     |
| 9430076C15Rik | chr6          | [53237246]                     | Fn3k          | chr11         | [121295883, 121296270]         |
| Aars          | chr8          | [113557594]                    | Fnip1         | chr11         | [54251604]                     |
| Abcb9         | chr5          | [124545833]                    | Foxred2       | chr15         | [77787190]                     |
| Adck3         | chr1          | [182126397]                    | G630090E17Rik | chr10         | [39680072]                     |
| Adck4         | chr7          | [28017882]                     | Gareml        | chr5          | [30431688]                     |
| Aldh1l2       | chr10         | [82996926]                     | Gga2          | chr7          | [129164706]                    |
| Als2          | chr1          | [59293994]                     | Glt1d1        | chr5          | [128112407]                    |
| Armxc1        | chrX          | [131252472]                    | Gm10560       | chr4          | [155398335]                    |
| Armxc3        | chrX          | [131291120]                    | Gm1141        | chrX          | [69177683]                     |
| Armxc6        | chrX          | [131285977]                    | Gm16515       | chr11         | [60727322]                     |
| Arrdc1        | chr2          | [24791121]                     | Gng3          | chr19         | [8914138]                      |
| Arsk          | chr13         | [76236454]                     | Golga5        | chr12         | [103707916]                    |
| Atg14         | chr14         | [48188103]                     | Gpbp111       | chr4          | [116229946]                    |
| Atp6v1c1      | chr15         | [38591692]                     | Gpc2          | chr5          | [138721565]                    |
| AW549877      | chr15         | [3945740, 3945748, 3945764]    | Gpnb          | chr6          | [48986588]                     |
| B4galnt2      | chr11         | [95776482]                     | Gps2          | chr11         | [69727689]                     |
| Bex1          | chrX          | [132750048]                    | Hagh          | chr17         | [24986943, 24987042]           |
| Bscl2         | chr19         | [8914529]                      | Heiq          | chr5          | [101227613]                    |
| C2cd2l        | chr9          | [44128830]                     | Hmgcl         | chr4          | [135502358]                    |
| Calr          | chr8          | [87371047]                     | Hsd1          | chr8          | [122099077]                    |
| Canx          | chr11         | [50139094]                     | Hsp90b1       | chr10         | [86168648]                     |
| Ccdc163       | chr4          | [116381138]                    | Hspa1a        | chr17         | [35109576]                     |
| Ccdc9         | chr7          | [16872140]                     | Hspbap1       | chr16         | [35770444]                     |
| Cdkn1c        | chr7          | [150647198]                    | Ica1          | chr6          | [8728434]                      |
| Cenpk         | chr13         | [105018214]                    | Ift172        | chr5          | [31593804]                     |
| Chaf1a        | chr17         | [56179738]                     | Ing4          | chr6          | [124989610]                    |
| Chmp7         | chr14         | [70132404]                     | Irak3         | chr10         | [119638641]                    |
| Cnppd1        | chr1          | [75139106, 75139288, 75139308] | Kcnip4        | chr5          | [48901443]                     |
| Cpeb4         | chr11         | [31770450]                     | Kdm4b         | chr17         | [56465246]                     |
| Crebrf        | chr17         | [26852468, 26852579, 26852597] | Khk           | chr5          | [31223859]                     |
| Cry1          | chr10         | [84647852]                     | Klf15         | chr6          | [90412203, 90412396, 90412565] |
| Ctns          | chr11         | [73012542]                     | Lgals3        | chr14         | [47993310, 47993623]           |
| Cystm1        | chr18         | [36508310]                     | Lin52         | chr12         | [85792453]                     |
| D6ErtD527e    | chr6          | [87054319]                     | Lmtk2         | chr5          | [144861230]                    |
| Dgkq          | chr5          | [109089828]                    | Lnp           | chr2          | [74417065]                     |
| Dhps          | chr8          | [87595598]                     | Lonp1         | chr17         | [56766355]                     |
| Dhtkd1        | chr2          | [5863815]                      | Lrrc48        | chr11         | [60166805]                     |
| Dleu2         | chr14         | [62301381]                     | Lrrc56        | chr7          | [148381036, 148381111]         |
| Eaf2          | chr16         | [36828827]                     | Lrrc73        | chr17         | [46390723]                     |
| Eif5a2        | chr3          | [28680080]                     | Lym9          | chr11         | [78639757]                     |
| Elovl4        | chr9          | [83699900]                     | Mamdc4        | chr2          | [25426761]                     |
| Epcam         | chr17         | [88035347]                     | Map1lc3b      | chr8          | [124114336]                    |
| Fabp3         | chr4          | [129985935]                    | Mark1         | chr1          | [186823628]                    |
| Fam178a       | chr19         | [45005456]                     | Mcoln1        | chr8          | [3500446, 3500472]             |
| Fam210b       | chr2          | [172170578, 172170623]         | Med4          | chr14         | [73909485]                     |

**Supplementary Table 2. (B) List of genes from RNA-seq. cluster 1 with putative CLEAR motif (continued)**

| Gene name    | Chr. location | motif_start (mm9)                                  | Gene name | Chr. location | motif_start (mm9)                 |
|--------------|---------------|----------------------------------------------------|-----------|---------------|-----------------------------------|
| Mfsd1        | chr3          | [67386602, 67386618, 67386652, 67386662, 67386670] | Slc38a9   | chr13         | [113450686]                       |
| Mfsd7c       | chr12         | [87087467]                                         | Slc5a8    | chr10         | [88348494]                        |
| Mocos        | chr18         | [24811721]                                         | Smox      | chr2          | [131317269]                       |
| Mpv17        | chr5          | [31456559, 31456593]                               | Smpd2     | chr10         | [41210333]                        |
| Mtss1        | chr8          | [113245325]                                        | Snora21   | chr11         | [97643319]                        |
| Muc2         | chr7          | [148875737]                                        | Snx32     | chr19         | [5510650]                         |
| Neur2        | chr2          | [164659154, 164659259, 164659276]                  | Sox21     | chr14         | [118636162]                       |
| Nfx1         | chr4          | [40918004]                                         | Sptbn2    | chr19         | [4711160]                         |
| Nkpd1        | chr7          | [20103885]                                         | Tbc1d24   | chr17         | [24342967]                        |
| Nmnat1       | chr4          | [148859521]                                        | Tbcel     | chr9          | [42280339]                        |
| Nol7         | chr13         | [43493364]                                         | Tceal1    | chrX          | [133242518]                       |
| Orc6         | chr8          | [87823410]                                         | Tmeff2    | chr1          | [50984316]                        |
| Osbp2        | chr11         | [3764006]                                          | Tmem181a  | chr17         | [6270376, 6270444]                |
| Osgep        | chr14         | [51544622]                                         | Tmem194   | chr10         | [127113738]                       |
| Palb2        | chr7          | [129276728]                                        | Tmem246   | chr4          | [49610686]                        |
| Pcgf1        | chr6          | [83028228]                                         | Tmem41b   | chr7          | [117129719, 117129771]            |
| Pcsk6        | chr7          | [73006726]                                         | Tom1      | chr8          | [77557599, 77557633]              |
| Pdhb         | chr14         | [9005747, 9005863]                                 | Tom12     | chr11         | [60166805]                        |
| Phyhip       | chr14         | [70857218]                                         | Trmt1     | chr8          | [87213163]                        |
| Pim2         | chrX          | [7454960]                                          | Tsc1      | chr2          | [28496423]                        |
| Plagl1       | chr10         | [12810454]                                         | Ttbk1     | chr17         | [46624808]                        |
| Plcg2        | chr8          | [120022153]                                        | Tubg2     | chr11         | [101017004]                       |
| Plgrkt       | chr19         | [29436282]                                         | Ubxn11    | chr4          | [133658412]                       |
| Pmaip1       | chr18         | [66618191]                                         | Ulk1      | chr5          | [111239469]                       |
| Pnpla7       | chr2          | [24831575]                                         | Ung       | chr5          | [114580088]                       |
| Poln         | chr5          | [34512097]                                         | Usp11     | chrX          | [20280697]                        |
| Ppargc1a     | chr5          | [51945151, 51945588]                               | Vps11     | chr9          | [44169746, 44169767]              |
| Prrg4        | chr2          | [104690152]                                        | Wbscr27   | chr5          | [135408091]                       |
| Ptpdc1       | chr13         | [48721065]                                         | Wdr19     | chr5          | [65590807]                        |
| Ptplad1      | chr9          | [64869595]                                         | Wdr62     | chr7          | [31065831, 31065901, 31065932]    |
| Qtrt1        | chr9          | [21216231]                                         | Wisp3     | chr10         | [38883831]                        |
| Rab24        | chr13         | [55423332]                                         | Ypel5     | chr17         | [73185640]                        |
| Rab5b        | chr10         | [128133665]                                        | Zer1      | chr2          | [29980593]                        |
| Rad51ap1     | chr6          | [126889507]                                        | Zfp112    | chr7          | [24896986]                        |
| Rad54b       | chr4          | [11485702, 11485794]                               | Zfp28     | chr7          | [6336094]                         |
| Rcan3        | chr4          | [134990055]                                        | Zfp296    | chr7          | [20162677]                        |
| Rfc4         | chr16         | [23128139]                                         | Zfp40     | chr17         | [23330294]                        |
| Rgs12        | chr5          | [35341633]                                         | Zfp459    | chr13         | [67522392]                        |
| Rnf207       | chr4          | [151693023]                                        | Zfr2      | chr10         | [80695511]                        |
| Rpa1         | chr11         | [75161946]                                         | Zmym6     | chr4          | [126754552, 126754589, 126754637] |
| Rpl3         | chr15         | [79914168]                                         |           |               |                                   |
| Rsph9        | chr17         | [46281535]                                         |           |               |                                   |
| Rtbdn        | chr8          | [87470624]                                         |           |               |                                   |
| Scnn1a       | chr6          | [125271305]                                        |           |               |                                   |
| Serac1       | chr17         | [6079729]                                          |           |               |                                   |
| Sfn          | chr4          | [133158117]                                        |           |               |                                   |
| Sh3bgr2      | chr9          | [83441793]                                         |           |               |                                   |
| Shmt1        | chr11         | [60624701]                                         |           |               |                                   |
| Sirt1        | chr10         | [62801819, 62801891]                               |           |               |                                   |
| Slc22a13b-ps | chr9          | [119140991, 119141220]                             |           |               |                                   |
| Slc26a11     | chr11         | [119216846]                                        |           |               |                                   |
| Slc38a7      | chr8          | [98377418, 98377433]                               |           |               |                                   |

- List of genes from RNA-seq Cluster 1 with putative CLEAR motif  
 - Criteria for a CLEAR motif was at most a single mismatch with the 8bp consensus CLEAR sequence (TCACGTGA). The motifs were searched within the region from the transcription start site (tss) to 500bp upstream to 100bp downstream.

**Supplementary Table 3. List of autophagy-related genes and lysosomal genes with increase in H3R17me2 upon glucose starvation.**

| Autophagy genes (n=127) |          |          |        | Lysosomal genes (n=190) |         |         |             |          |
|-------------------------|----------|----------|--------|-------------------------|---------|---------|-------------|----------|
| Akt1                    | Dclk2    | Mtlnr14  | Stk36  | Abca5                   | Creg1   | Gpr137b | Naga        | Sidt2    |
| Ambra1                  | Ddit3    | Mtor     | Tmem74 | Abcb9                   | Crhbp   | Grn     | Naglu       | Slc15a4  |
| Arsb                    | Dlc1     | Myc      | Tsc1   | Acp2                    | Cst3    | Gusb    | Nagpa       | Slc26a11 |
| Atf6                    | Dnajb9   | Nbr1     | Tusc1  | Ada                     | Ctns    | H2-Aa   | Nbr1        | Slc31a1  |
| Atg10                   | Egfr     | Nfe2l2   | Ulk1   | Adam8                   | Cts7    | H2-DMa  | Neu1        | Slc36a1  |
| Atg12                   | Eif2ak2  | Nfkb1    | Ulk3   | Anxa11                  | Ctsa    | H2-Eb1  | Nup62-il4i1 | Slc48a1  |
| Atg13                   | Eif4ebp1 | Nuak1    | Usp10  | Ap1g1                   | Ctsc    | Hexa    | Oca2        | Smpd1    |
| Atg16l1                 | Eif4g1   | Park2    | Vamp3  | Ap1g2                   | Ctsd    | Hexb    | Ostm1       | Snap23   |
| Atg2a                   | Fadd     | Parp1    | Vegfa  | Ap1m1                   | Ctsf    | Hgsnat  | P2ry2       | Sort1    |
| Atg4a                   | Fos      | Pelp1    | Wdr45  | Ap1s3                   | Ctsj    | Hps4    | Pcyox1      | Sphk2    |
| Atg4b                   | Foxo3    | Pik3r4   | Wipi1  | Ap3b2                   | Cubn    | Hpse    | Pdgfrb      | Spns1    |
| Atic                    | Gaa      | Pink1    | Wipi2  | Ap3m1                   | Dnase2a | Hyal2   | Pdia3       | Srgn     |
| Bag1                    | Gabarap  | Plk3     | Zfyve1 | Ap3s2                   | Doc2a   | Hyal3   | Pf4         | Stx3     |
| Bag3                    | Gabarap1 | Plk4     |        | Ap4m1                   | Dpp7    | Ids     | Pla2g15     | Stx7     |
| Bax                     | Gabarap2 | Ppp1r15a |        | Ap4s1                   | Dram2   | Idua    | Pld3        | Stx8     |
| Bcl2                    | Gapdh    | Prkab1   |        | Arl8a                   | Ear14   | Ifitm3  | Plod1       | Stxbp2   |
| Bcl2l1                  | Gnai3    | Prkar1a  |        | Arl8b                   | Ear4    | Igf2r   | Pnpla7      | Sult1c2  |
| Becn1                   | Grid1    | Prkod    |        | Arsb                    | Elane   | Kcne1   | Pon2        | Sumf1    |
| Bid                     | Harbi1   | Ptk6     |        | Arsg                    | Entpd4  | Lamp1   | Ppt1        | Syt7     |
| Birc5                   | Hdac6    | Rab24    |        | Asah1                   | Fam20c  | Lamp2   | Ppt2        | Tcirg1   |
| Bnip1                   | Hgs      | Rab33b   |        | Ass1                    | Fasl    | Lamtor1 | Pqlc2       | Tecpr1   |
| Calcoco1                | Hif1a    | Rab5a    |        | Atp13a2                 | Fgfr3   | Lamtor2 | Prcp        | Thbs1    |
| Camk1                   | Hsp90ab1 | Raf1     |        | Atp6v0a1                | Flot1   | Laptm4a | Psap        | Tlr9     |
| Camk1d                  | Hspb8    | Rela     |        | Atp6v0a2                | Flot2   | Lgmn    | Psen1       | Tmem74   |
| Camk2a                  | Ikbbk    | Rps6kb1  |        | Atp6v0b                 | Fth1    | Lipa    | Psen2       | Tmem9    |
| Camk2b                  | Ikcke    | Rps6kb2  |        | Atp6v0c                 | Ftl1    | Lrba    | Rab27a      | Tpcn1    |
| Camk2g                  | Itga3    | Rptor    |        | Atp6v0d1                | Fuca2   | Man2b1  | Rab7        | Tpp1     |
| Camkk2                  | Itpr1    | Sar1a    |        | Atp6v1g1                | Fyco1   | Man2b2  | Rilp        | Trim23   |
| Capn1                   | Klhl24   | Sesn2    |        | Atp6v1h                 | Gaa     | Manba   | Rnaset2a    | Unc13d   |
| Capn10                  | Lamp1    | Sik1     |        | Calcr1                  | Gabarap | Manf    | Rnaset2b    | Vamp8    |
| Cd46                    | Lamp2    | Sik2     |        | Cckar                   | Galc    | March2  | Rnf152      | Vps11    |
| Cdkn1a                  | Map2k7   | Sirt1    |        | Cd63                    | Gba     | March9  | Rptor       | Vps18    |
| Cdkn2a                  | Mapk1    | Sirt2    |        | Cd74                    | Gga2    | March8  | Rraga       | Vps33a   |
| Cflar                   | Mapk3    | Snrk     |        | Chid1                   | Ggh     | Mfsd8   | Rragc       | Vps33b   |
| Chd9                    | Mapk8ip1 | Sphk1    |        | Chit1                   | Gimap5  | Mmp13   | Rragd       | Vps39    |
| Chmp2b                  | Mapk9    | Spns1    |        | Cln3                    | Gja1    | Mtor    | Scarb2      | Wdr48    |
| Cln3                    | Mark1    | Sqstm1   |        | Cln5                    | Gns     | Myh1    | Scpep1      | Znrf1    |
| Ctsd                    | Mark2    | St13     |        | Cltb                    | Got1    | Naaa    | Sgsh        | Znrf2    |

List of autophagy and lysosomal genes with increase in H3R17me2 upon glucose starvation

H3R17me2 peak Tag counts GS18h / H3R17me2 peak Tag count GS0h  $\geq 1.5$
